# Supplementary material for: Callous-Unemotional Traits in Adolescents' Daily Life: Associations with Affect and Emotional and Conduct Problems
Source: Springer Nature journal article supplement (doi:10.1007/s10802-023-01077-6), 2023-05-30
Supplement: MOESM1 [file 25426572]

**Callous-Unemotional Traits in Adolescents' Daily Life: Associations with Affect and Emotional and Conduct Problems**

Natalie Goulter

School of Psychology, Newcastle University, United Kingdom

Department of Psychology, Simon Fraser University, Canada

Eric M. Cooke

Criminal Justice Program, Bowling Green State University, United States of America

Yao Zheng

Department of Psychology, University of Alberta, Canada

**Author Note**

Natalie Goulter  <https://orcid.org/0000-0003-0682-7781>

Eric M. Cooke  <https://orcid.org/0000-0002-5630-3217>

Yao Zheng  <https://orcid.org/0000-0002-0302-0598>

**Corresponding Author Contact Details**

Natalie Goulter, [natalie.goulter@newcastle.ac.uk](mailto:natalie.goulter@newcastle.ac.uk)

## Supplementary Materials

**Supplementary Table S1**

*Means, Standard Deviations, ICCs, and Correlations for Callous-Unemotional Traits Items*

| Item | <i>M</i> | <i>SD</i> | <i>Range</i> | ICC | CU1    | CU2    | CU3     | CU4     | CU5    | CU6    | CU7    | CU8     | CU9     | CU10   | CU11   | CU12    |
|------|----------|-----------|--------------|-----|--------|--------|---------|---------|--------|--------|--------|---------|---------|--------|--------|---------|
| CU1  | .11      | .38       | 0–3          | .66 | —      | .03    | .03     | .13***  | .15*** | .21*** | .11*** | .08***  | .09***  | .10*** | .08*** | .12***  |
| CU2  | 1.02     | 1.16      | 0–3          | .77 | .22    | —      | -.07*** | .25***  | .14*** | .05*   | -.04   | .18***  | .19***  | .01    | .07*** | .17***  |
| CU3  | 1.52     | 1.12      | 0–3          | .78 | -.01   | .45*** | —       | -.20*** | .05*   | .05*   | .09*** | -.13*** | -.11*** | .04*   | .03    | -.06*** |
| CU4  | .52      | .74       | 0–3          | .60 | .51*** | .21    | -.28    | —       | .08**  | .08*** | .09*** | .39***  | .40***  | .04*   | .10*** | .34***  |
| CU5  | .28      | .60       | 0–3          | .71 | .75*** | .18    | -.02    | .58***  | —      | .31*** | .09*** | .04***  | .06***  | .09*** | .08*** | .06***  |
| CU6  | .24      | .56       | 0–3          | .70 | .73*** | .14    | .04     | .50***  | .86*** | —      | .19*** | .08***  | .06***  | .12*** | .10*** | .10***  |
| CU7  | .43      | .73       | 0–3          | .66 | .35*** | .06    | .33***  | .40***  | .40*** | .61*** | —      | .06***  | .09***  | .11*** | .09*** | .11***  |
| CU8  | .63      | .83       | 0–3          | .62 | .50*** | .18    | -.25    | .83***  | .55*** | .48*** | .33*** | —       | .56***  | .07*** | .09*** | .36***  |
| CU9  | .50      | .78       | 0–3          | .62 | .54*** | .28    | -.19    | .92***  | .55*** | .52*** | .40*** | .82***  | —       | .01    | .10*** | .36***  |
| CU10 | .24      | .58       | 0–3          | .61 | .67*** | .19    | -.03    | .61***  | .71*** | .73*** | .47*** | .47***  | .61***  | —      | .12*** | .05*    |
| CU11 | .16      | .50       | 0–3          | .56 | .75*** | .11    | -.01    | .60***  | .62*** | .71*** | .55*** | .47***  | .54***  | .80*** | —      | .09***  |
| CU12 | .66      | .82       | 0–3          | .68 | .39*** | .13    | -.29*** | .89***  | .44*** | .41*** | .37*** | .78***  | .83***  | .47*** | .40*** | —       |

*Note:* Item correlations estimated using the Bayes estimator. Within-level item correlations are shown above the diagonal. Between-level item correlations are shown below the diagonal. Items 2, 4, 8, 9, 12 are reverse coded. *M* = mean, *SD* = standard deviation, ICC = intraclass correlation coefficient. \* $p \leq .05$ , \*\* $p \leq .01$ , \*\*\* $p \leq .001$

**Supplementary Table S2**

*DSEM Standardized Estimates for Callous-Unemotional Traits Items Within-Person Autoregressive Effects*

| <b>Item</b>           | <b><math>\beta</math></b> | <b><i>SD</i></b> | <b><i>p</i></b> | <b>95% <i>CI</i><sub>lower</sub></b> | <b>95% <i>CI</i><sub>upper</sub></b> |
|-----------------------|---------------------------|------------------|-----------------|--------------------------------------|--------------------------------------|
| <i>Within-Person</i>  |                           |                  |                 |                                      |                                      |
| <i>Autoregressive</i> |                           |                  |                 |                                      |                                      |
| CU1 → CU1             | <b>.08</b>                | <b>.03</b>       | <b>.001</b>     | <b>.03</b>                           | <b>.14</b>                           |
| CU2 → CU2             | <b>.19</b>                | <b>.03</b>       | <b>&lt;.001</b> | <b>.14</b>                           | <b>.24</b>                           |
| CU3 → CU3             | <b>.23</b>                | <b>.03</b>       | <b>&lt;.001</b> | <b>.18</b>                           | <b>.28</b>                           |
| CU4 → CU4             | <b>.08</b>                | <b>.03</b>       | <b>.004</b>     | <b>.02</b>                           | <b>.15</b>                           |
| CU5 → CU5             | <b>.18</b>                | <b>.03</b>       | <b>&lt;.001</b> | <b>.12</b>                           | <b>.23</b>                           |
| CU6 → CU6             | .05                       | .03              | .043            | -.01                                 | .11                                  |
| CU7 → CU7             | <b>.13</b>                | <b>.03</b>       | <b>&lt;.001</b> | <b>.08</b>                           | <b>.18</b>                           |
| CU8 → CU8             | <b>.08</b>                | <b>.03</b>       | <b>.004</b>     | <b>.02</b>                           | <b>.14</b>                           |
| CU9 → CU9             | <b>.17</b>                | <b>.03</b>       | <b>&lt;.001</b> | <b>.10</b>                           | <b>.23</b>                           |
| CU10 → CU10           | .05                       | .03              | .034            | -.00                                 | .10                                  |
| CU11 → CU11           | <b>.08</b>                | <b>.03</b>       | <b>.002</b>     | <b>.02</b>                           | <b>.13</b>                           |
| CU12 → CU12           | <b>.17</b>                | <b>.03</b>       | <b>&lt;.001</b> | <b>.11</b>                           | <b>.22</b>                           |

*Note:* Bolded indicates significance based on CI. Items 2, 4, 8, 9, 12 are reverse coded.  $\beta$  = standardized beta, *SD* = standard deviation, CI = credible interval.

### Supplementary Table S3

*DSEM Standardized Estimates for Callous-Unemotional Traits Items Within-Person Cross-Lagged Effects*

| Item                 | $\beta$     | <i>SD</i>  | <i>p</i>        | 95% <i>CI</i> <sub>lower</sub> | 95% <i>CI</i> <sub>upper</sub> |
|----------------------|-------------|------------|-----------------|--------------------------------|--------------------------------|
| <i>Within-Person</i> |             |            |                 |                                |                                |
| <i>Cross-Lagged</i>  |             |            |                 |                                |                                |
| <i>CU1</i>           |             |            |                 |                                |                                |
| CU1 → CU2            | <b>.06</b>  | <b>.03</b> | <b>.010</b>     | <b>.01</b>                     | <b>.11</b>                     |
| CU1 → CU3            | .00         | .03        | .498            | -.05                           | .05                            |
| CU1 → CU4            | -.04        | .03        | .075            | -.10                           | .02                            |
| CU1 → CU5            | .04         | .03        | .077            | -.02                           | .09                            |
| CU1 → CU6            | .04         | .03        | .109            | -.02                           | .09                            |
| CU1 → CU7            | -.01        | .03        | .378            | -.06                           | .04                            |
| CU1 → CU8            | -.01        | .03        | .410            | -.07                           | .06                            |
| CU1 → CU9            | .00         | .03        | .482            | -.06                           | .07                            |
| CU1 → CU10           | .02         | .03        | .247            | -.04                           | .07                            |
| CU1 → CU11           | -.03        | .03        | .120            | -.08                           | .02                            |
| CU1 → CU12           | <b>.06</b>  | <b>.03</b> | <b>.022</b>     | <b>.00</b>                     | <b>.12</b>                     |
| <i>CU2</i>           |             |            |                 |                                |                                |
| CU2 → CU1            | -.02        | .03        | .180            | -.07                           | .03                            |
| CU2 → CU3            | .03         | .02        | .153            | -.02                           | .07                            |
| CU2 → CU4            | -.04        | .03        | .081            | -.10                           | .02                            |
| CU2 → CU5            | -.01        | .03        | .350            | -.06                           | .04                            |
| CU2 → CU6            | .02         | .03        | .228            | -.03                           | .07                            |
| CU2 → CU7            | -.02        | .02        | .242            | -.06                           | .03                            |
| CU2 → CU8            | -.03        | .03        | .184            | -.09                           | .03                            |
| CU2 → CU9            | .04         | .03        | .122            | -.02                           | .10                            |
| CU2 → CU10           | -.01        | .02        | .297            | -.06                           | .04                            |
| CU2 → CU11           | <b>.07</b>  | <b>.03</b> | <b>.003</b>     | <b>.02</b>                     | <b>.12</b>                     |
| CU2 → CU12           | <b>.13</b>  | <b>.03</b> | <b>&lt;.001</b> | <b>.07</b>                     | <b>.18</b>                     |
| <i>CU3</i>           |             |            |                 |                                |                                |
| CU3 → CU1            | .01         | .03        | .331            | -.04                           | .06                            |
| CU3 → CU2            | <b>.05</b>  | <b>.03</b> | <b>.016</b>     | <b>.00</b>                     | <b>.10</b>                     |
| CU3 → CU4            | .01         | .03        | .366            | -.05                           | .07                            |
| CU3 → CU5            | .03         | .03        | .158            | -.03                           | .08                            |
| CU3 → CU6            | -.04        | .03        | .099            | -.09                           | .02                            |
| CU3 → CU7            | .00         | .02        | .439            | -.04                           | .05                            |
| CU3 → CU8            | .01         | .03        | .363            | -.05                           | .05                            |
| CU3 → CU9            | <b>-.06</b> | <b>.03</b> | <b>.023</b>     | <b>-.12</b>                    | <b>-.00</b>                    |
| CU3 → CU10           | .01         | .02        | .416            | -.04                           | .05                            |
| CU3 → CU11           | -.01        | .03        | .385            | -.06                           | .04                            |
| CU3 → CU12           | .01         | .03        | .396            | -.05                           | .06                            |
| <i>CU4</i>           |             |            |                 |                                |                                |
| CU4 → CU1            | -.03        | .03        | .115            | -.09                           | .02                            |
| CU4 → CU2            | -.01        | .03        | .432            | -.06                           | .05                            |
| CU4 → CU3            | -.00        | .03        | .460            | -.05                           | .05                            |
| CU4 → CU5            | .02         | .03        | .194            | -.03                           | .08                            |
| CU4 → CU6            | -.01        | .03        | .354            | -.07                           | .05                            |
| CU4 → CU7            | <b>.06</b>  | <b>.03</b> | <b>.009</b>     | <b>.01</b>                     | <b>.11</b>                     |
| CU4 → CU8            | .01         | .03        | .440            | -.06                           | .07                            |
| CU4 → CU9            | <b>.08</b>  | <b>.03</b> | <b>.012</b>     | <b>.01</b>                     | <b>.14</b>                     |
| CU4 → CU10           | .02         | .03        | .232            | -.03                           | .07                            |
| CU4 → CU11           | .00         | .03        | .491            | -.05                           | .05                            |
| CU4 → CU12           | <b>.08</b>  | <b>.03</b> | <b>.002</b>     | <b>.03</b>                     | <b>.14</b>                     |

*CU5*

|            |            |            |             |            |            |
|------------|------------|------------|-------------|------------|------------|
| CU5 → CU1  | .05        | .03        | .046        | -.01       | .10        |
| CU5 → CU2  | <b>.05</b> | <b>.03</b> | <b>.021</b> | <b>.00</b> | <b>.10</b> |
| CU5 → CU3  | .03        | .03        | .102        | -.02       | .08        |
| CU5 → CU4  | -.05       | .03        | .045        | -.11       | .01        |
| CU5 → CU6  | -.05       | .03        | .042        | -.10       | .01        |
| CU5 → CU7  | -.01       | .03        | .422        | -.05       | .04        |
| CU5 → CU8  | .02        | .03        | .273        | -.04       | .08        |
| CU5 → CU9  | .00        | .03        | .470        | -.06       | .07        |
| CU5 → CU10 | .02        | .03        | .196        | -.03       | .07        |
| CU5 → CU11 | -.01       | .03        | .310        | -.06       | .04        |
| CU5 → CU12 | <b>.07</b> | <b>.03</b> | <b>.016</b> | <b>.00</b> | <b>.12</b> |

*CU6*

|            |            |            |             |            |            |
|------------|------------|------------|-------------|------------|------------|
| CU6 → CU1  | .04        | .03        | .101        | -.02       | .09        |
| CU6 → CU2  | <b>.06</b> | <b>.03</b> | <b>.017</b> | <b>.00</b> | <b>.11</b> |
| CU6 → CU3  | .00        | .03        | .479        | -.05       | .05        |
| CU6 → CU4  | .00        | .03        | .456        | -.05       | .06        |
| CU6 → CU5  | .02        | .03        | .235        | -.03       | .08        |
| CU6 → CU7  | <b>.07</b> | <b>.03</b> | <b>.004</b> | <b>.02</b> | <b>.12</b> |
| CU6 → CU8  | .01        | .03        | .419        | -.06       | .07        |
| CU6 → CU9  | -.03       | .03        | .186        | -.09       | .03        |
| CU6 → CU10 | -.01       | .03        | .379        | -.06       | .04        |
| CU6 → CU11 | -.01       | .03        | .337        | -.06       | .04        |
| CU6 → CU12 | .03        | .03        | .157        | -.03       | .09        |

*CU7*

|            |             |            |             |             |             |
|------------|-------------|------------|-------------|-------------|-------------|
| CU7 → CU1  | .01         | .03        | .311        | -.04        | .06         |
| CU7 → CU2  | <b>-.07</b> | <b>.03</b> | <b>.002</b> | <b>-.12</b> | <b>-.02</b> |
| CU7 → CU3  | .02         | .03        | .189        | -.03        | .07         |
| CU7 → CU4  | -.02        | .03        | .198        | -.08        | .03         |
| CU7 → CU5  | .00         | .03        | .455        | -.05        | .06         |
| CU7 → CU6  | -.03        | .03        | .133        | -.08        | .02         |
| CU7 → CU8  | .06         | .03        | .030        | -.00        | .12         |
| CU7 → CU9  | <b>.07</b>  | <b>.03</b> | <b>.011</b> | <b>.01</b>  | <b>.13</b>  |
| CU7 → CU10 | -.02        | .03        | .174        | -.07        | .03         |
| CU7 → CU11 | -.02        | .03        | .229        | -.07        | .03         |
| CU7 → CU12 | .02         | .03        | .255        | -.04        | .08         |

*CU8*

|            |            |            |                 |            |            |
|------------|------------|------------|-----------------|------------|------------|
| CU8 → CU1  | -.04       | .03        | .072            | -.09       | .01        |
| CU8 → CU2  | .02        | .03        | .197            | -.03       | .07        |
| CU8 → CU3  | -.02       | .03        | .170            | -.07       | .03        |
| CU8 → CU4  | .04        | .03        | .103            | -.02       | .09        |
| CU8 → CU5  | -.02       | .03        | .191            | -.08       | .03        |
| CU8 → CU6  | -.04       | .03        | .075            | -.09       | .02        |
| CU8 → CU7  | <b>.10</b> | <b>.02</b> | <b>&lt;.001</b> | <b>.05</b> | <b>.14</b> |
| CU8 → CU9  | <b>.10</b> | <b>.03</b> | <b>.001</b>     | <b>.04</b> | <b>.16</b> |
| CU8 → CU10 | .02        | .03        | .184            | -.03       | .07        |
| CU8 → CU11 | <b>.05</b> | <b>.03</b> | <b>.020</b>     | <b>.00</b> | <b>.10</b> |
| CU8 → CU12 | .05        | .03        | .038            | -.01       | .11        |

*CU9*

|           |             |            |                 |             |             |
|-----------|-------------|------------|-----------------|-------------|-------------|
| CU9 → CU1 | .02         | .03        | .258            | -.03        | .07         |
| CU9 → CU2 | .01         | .03        | .291            | -.04        | .06         |
| CU9 → CU3 | -.02        | .03        | .258            | -.07        | .03         |
| CU9 → CU4 | .03         | .03        | .186            | -.03        | .08         |
| CU9 → CU5 | -.01        | .03        | .397            | -.06        | .05         |
| CU9 → CU6 | <b>-.09</b> | <b>.03</b> | <b>&lt;.001</b> | <b>-.14</b> | <b>-.04</b> |
| CU9 → CU7 | <b>.10</b>  | <b>.02</b> | <b>&lt;.001</b> | <b>.05</b>  | <b>.14</b>  |

|             |             |            |             |             |             |
|-------------|-------------|------------|-------------|-------------|-------------|
| CU9 → CU8   | .06         | .03        | .003        | -.00        | .11         |
| CU9 → CU10  | -.02        | .02        | .245        | -.06        | .03         |
| CU9 → CU11  | .04         | .03        | .064        | -.01        | .09         |
| CU9 → CU12  | <b>.07</b>  | <b>.03</b> | <b>.009</b> | <b>.01</b>  | <b>.12</b>  |
| <i>CU10</i> |             |            |             |             |             |
| CU10 → CU1  | .03         | .03        | .111        | -.02        | .09         |
| CU10 → CU2  | -.01        | .03        | .328        | -.07        | .04         |
| CU10 → CU3  | .02         | .03        | .209        | -.03        | .07         |
| CU10 → CU4  | -.01        | .03        | .414        | -.07        | .05         |
| CU10 → CU5  | -.00        | .03        | .470        | -.06        | .05         |
| CU10 → CU6  | -.03        | .03        | .129        | -.09        | .02         |
| CU10 → CU7  | .05         | .03        | .035        | -.00        | .10         |
| CU10 → CU8  | -.00        | .03        | .482        | -.07        | .06         |
| CU10 → CU9  | .02         | .03        | .295        | -.05        | .08         |
| CU10 → CU11 | .02         | .03        | .265        | -.04        | .07         |
| CU10 → CU12 | .02         | .03        | .295        | -.05        | .08         |
| <i>CU11</i> |             |            |             |             |             |
| CU11 → CU1  | .05         | .03        | .027        | -.00        | .11         |
| CU11 → CU2  | <b>.06</b>  | <b>.03</b> | <b>.010</b> | <b>.01</b>  | <b>.12</b>  |
| CU11 → CU3  | .02         | .03        | .219        | -.03        | .07         |
| CU11 → CU4  | -.05        | .03        | .048        | -.11        | .01         |
| CU11 → CU5  | .04         | .03        | .077        | -.01        | .09         |
| CU11 → CU6  | -.02        | .03        | .226        | -.08        | .03         |
| CU11 → CU7  | .02         | .03        | .190        | -.03        | .07         |
| CU11 → CU8  | -.02        | .03        | .304        | -.08        | .05         |
| CU11 → CU9  | .02         | .03        | .237        | -.04        | .09         |
| CU11 → CU10 | .02         | .03        | .236        | -.04        | .07         |
| CU11 → CU12 | <b>.07</b>  | <b>.03</b> | <b>.010</b> | <b>.01</b>  | <b>.13</b>  |
| <i>CU12</i> |             |            |             |             |             |
| CU12 → CU1  | .03         | .03        | .178        | -.03        | .08         |
| CU12 → CU2  | .03         | .03        | .110        | -.02        | .09         |
| CU12 → CU3  | .00         | .03        | .440        | -.05        | .05         |
| CU12 → CU4  | -.01        | .03        | .438        | -.06        | .06         |
| CU12 → CU5  | -.00        | .03        | .490        | -.05        | .06         |
| CU12 → CU6  | <b>-.05</b> | <b>.03</b> | <b>.021</b> | <b>-.11</b> | <b>-.00</b> |
| CU12 → CU7  | <b>.08</b>  | <b>.03</b> | <b>.001</b> | <b>.03</b>  | <b>.13</b>  |
| CU12 → CU8  | -.02        | .03        | .227        | -.09        | .04         |
| CU12 → CU9  | .03         | .03        | .144        | -.03        | .10         |
| CU12 → CU10 | .01         | .03        | .426        | -.04        | .05         |
| CU12 → CU11 | .04         | .03        | .060        | -.01        | .09         |

*Note:* Bolded indicates significance based on CI. Items 2, 4, 8, 9, 12 are reverse coded.  $\beta$  = standardized beta, *SD* = standard deviation, CI = credible interval.

**Supplementary Table S4**

*Means, Standard Deviations, ICCs, and Correlations for CU Traits, Positive Affect, Negative Affect, Conduct Problems, and Emotional Problems Subscales*

| <b>Item</b>           | <b><i>M</i></b> | <b><i>SD</i></b> | <b><i>Range</i></b> | <b>ICC</b> | <b>1</b> | <b>2</b> | <b>3</b> | <b>4</b> | <b>5</b> | <b>6</b> |
|-----------------------|-----------------|------------------|---------------------|------------|----------|----------|----------|----------|----------|----------|
| 1. Callousness        | .24             | .37              | 0.00-2.33           | .66        | —        | .19***   | -.02     | .20***   | .23***   | .14**    |
| 2. Uncaring           | .66             | .62              | 0.00-3.00           | .60        | .57***   | —        | -.12***  | .10*     | .22***   | .04      |
| 3. Positive Affect    | 2.66            | .94              | 1.00-5.00           | .70        | -.24*    | -.34***  | —        | .08      | -.05     | -.07     |
| 4. Negative Affect    | 1.59            | .80              | 1.00-5.00           | .62        | .51***   | .07      | -.16     | —        | .28***   | .51***   |
| 5. Conduct Problems   | .18             | .26              | 0.00-1.40           | .61        | .71***   | .58***   | -.29**   | .50***   | —        | .17***   |
| 6. Emotional Problems | .44             | .51              | 0.00-2.00           | .76        | .40***   | .07      | -.38***  | .87***   | .46***   | —        |

*Note:* Item correlations estimated using the Bayes estimator. Within-level item correlations are shown above the diagonal. Between-level item correlations are shown below the diagonal. *M* = mean, *SD* = standard deviation, ICC = intraclass correlation coefficient. \*  $p \leq .05$ , \*\*  $p \leq .01$ , \*\*\*  $p \leq .001$

**Supplementary Table S5**

*DSEM Standardized Estimates for Callous-Unemotional Traits, Positive Affect, Negative Affect, Conduct Problems, and Emotional Problems Subscales Within-Person Autoregressive Effects*

| <b>Item</b>                             | <b><math>\beta</math></b> | <b><i>SD</i></b> | <b><i>p</i></b> | <b>95% <i>CI</i><sub>lower</sub></b> | <b>95% <i>CI</i><sub>upper</sub></b> |
|-----------------------------------------|---------------------------|------------------|-----------------|--------------------------------------|--------------------------------------|
| <i>Within-Person</i>                    |                           |                  |                 |                                      |                                      |
| <i>Autoregressive</i>                   |                           |                  |                 |                                      |                                      |
| Callousness → Callousness               | <b>.13</b>                | <b>.03</b>       | <b>&lt;.001</b> | <b>.08</b>                           | <b>.18</b>                           |
| Uncaring → Uncaring                     | <b>.26</b>                | <b>.03</b>       | <b>&lt;.001</b> | <b>.21</b>                           | <b>.32</b>                           |
| Positive Affect → Positive Affect       | <b>.29</b>                | <b>.03</b>       | <b>&lt;.001</b> | <b>.24</b>                           | <b>.34</b>                           |
| Negative Affect → Negative Affect       | <b>.35</b>                | <b>.03</b>       | <b>&lt;.001</b> | <b>.29</b>                           | <b>.41</b>                           |
| Conduct Problems → Conduct Problems     | <b>.21</b>                | <b>.03</b>       | <b>&lt;.001</b> | <b>.16</b>                           | <b>.26</b>                           |
| Emotional Problems → Emotional Problems | <b>.34</b>                | <b>.03</b>       | <b>&lt;.001</b> | <b>.29</b>                           | <b>.40</b>                           |

*Note:* Bolded indicates significance based on CI.  $\beta$  = standardized beta, *SD* = standard deviation, CI = credible interval.



### Supplementary Table S6

*DSEM Standardized Estimates for Callous-Unemotional Traits, Positive Affect, Negative Affect, Conduct Problems, and Emotional Problems Subscales Within-Person Cross-Lagged Effects*

| Item                                  | $\beta$    | <i>SD</i>  | <i>p</i>    | 95% <i>CI</i> <sub>lower</sub> | 95% <i>CI</i> <sub>upper</sub> |
|---------------------------------------|------------|------------|-------------|--------------------------------|--------------------------------|
| <i>Within-Person</i>                  |            |            |             |                                |                                |
| <i>Cross-Lagged</i>                   |            |            |             |                                |                                |
| <i>Callousness</i>                    |            |            |             |                                |                                |
| Callousness → Uncaring                | <b>.08</b> | <b>.03</b> | <b>.001</b> | <b>.03</b>                     | <b>.13</b>                     |
| Callousness → Positive Affect         | .05        | .03        | .032        | -.00                           | .10                            |
| Callousness → Negative Affect         | -.04       | .03        | .082        | -.11                           | .02                            |
| Callousness → Conduct Problems        | .01        | .03        | .334        | -.04                           | .06                            |
| Callousness → Emotional Problems      | .05        | .03        | .054        | -.01                           | .11                            |
| <i>Uncaring</i>                       |            |            |             |                                |                                |
| Uncaring → Callous                    | .04        | .03        | .078        | -.01                           | .09                            |
| Uncaring → Positive Affect            | -.03       | .02        | .150        | -.07                           | .02                            |
| Uncaring → Negative Affect            | -.02       | .03        | .240        | -.08                           | .04                            |
| Uncaring → Conduct Problems           | .05        | .03        | .026        | .00                            | .10                            |
| Uncaring → Emotional Problems         | .00        | .03        | .456        | -.06                           | .06                            |
| <i>Positive Affect</i>                |            |            |             |                                |                                |
| Positive Affect → Callous             | <b>.05</b> | <b>.03</b> | <b>.024</b> | <b>.00</b>                     | <b>.10</b>                     |
| Positive Affect → Uncaring            | -.04       | .03        | .070        | -.09                           | .01                            |
| Positive Affect → Negative Affect     | .05        | .03        | .063        | -.01                           | .10                            |
| Positive Affect → Conduct Problems    | -.01       | .03        | .280        | -.06                           | .04                            |
| Positive Affect → Emotional Problems  | -.00       | .03        | .452        | -.06                           | .05                            |
| <i>Negative Affect</i>                |            |            |             |                                |                                |
| Negative Affect → Callous             | -.00       | .03        | .439        | -.05                           | .05                            |
| Negative Affect → Uncaring            | .01        | .02        | .410        | -.05                           | .05                            |
| Negative Affect → Positive Affect     | .05        | .02        | .026        | -.00                           | .09                            |
| Negative Affect → Conduct Problems    | -.02       | .03        | .173        | -.07                           | .03                            |
| Negative Affect → Emotional Problems  | <b>.07</b> | <b>.03</b> | <b>.009</b> | <b>.01</b>                     | <b>.13</b>                     |
| <i>Conduct Problems</i>               |            |            |             |                                |                                |
| Conduct Problems → Callous            | .03        | .03        | .153        | -.02                           | .08                            |
| Conduct Problems → Uncaring           | <b>.05</b> | <b>.03</b> | <b>.023</b> | <b>.00</b>                     | <b>.10</b>                     |
| Conduct Problems → Positive Affect    | .04        | .03        | .053        | -.01                           | .09                            |
| Conduct Problems → Negative Affect    | .00        | .03        | .498        | -.06                           | .06                            |
| Conduct Problems → Emotional Problems | .01        | .03        | .412        | -.05                           | .06                            |
| <i>Emotional Problems</i>             |            |            |             |                                |                                |
| Emotional Problems → Callous          | .02        | .02        | .223        | -.03                           | .07                            |
| Emotional Problems → Uncaring         | .03        | .02        | .129        | -.02                           | .08                            |
| Emotional Problems → Positive Affect  | .03        | .02        | .084        | -.01                           | .08                            |
| Emotional Problems → Negative Affect  | <b>.09</b> | <b>.03</b> | <b>.001</b> | <b>.03</b>                     | <b>.15</b>                     |
| Emotional Problems → Conduct Problems | -.03       | .03        | .094        | -.08                           | .02                            |

*Note:* Bolded indicates significance based on CI.  $\beta$  = standardized beta, *SD* = standard deviation, CI = credible interval.
